# Supplementary material for: CD103+ cDC1 and endogenous CD8+ T cells are necessary for improved CD40L-overexpressing CAR T cell antitumor function
Source: PubMed Central journal article supplement (PMC7710757; doi:10.1038/s41467-020-19833-3), 2020-12-02
Supplement: 41467_2020_19833_MOESM1_ESM.pdf [file 41467_2020_19833_MOESM1_ESM.pdf]

# **CD40L-overexpressing CAR T cells induce CD103+ cDC1 to prime endogenous CD8+ T cells for enhanced anti-tumor responses**

Nicholas F. Kuhn<sup>1,2,3</sup>, Andrea V. Lopez<sup>2</sup>, Xinghuo Li<sup>2</sup>, Winson Cai<sup>2</sup>, Anthony F. Daniyan<sup>2</sup>,  
Renier J. Brentjens<sup>2,\*</sup>

<sup>1</sup>Louis V. Gerstner Jr. Graduate School of Biomedical Sciences, Memorial Sloan Kettering Cancer Center, New York, NY, USA.

<sup>2</sup>Department of Medicine, Memorial Sloan Kettering Cancer Center, New York, NY, USA.

<sup>3</sup>Current address: Department of Pathology, University of California San Francisco, San Francisco, CA, USA

\*Corresponding author

## **Supplementary Information**



(bottom) CAR T cell-treated mice. Ratios of cDC1/cDC2 populations in the tumor (**c**) and spleen (**d**) are plotted over time. Data in **c** is plotted as mean  $\pm$  SD (Day 1, 2: n=3/group; Day 3: n=8/group; Day 7: n=7/group.) and results are representative of 2 to 3 experiments. Each dot represents one mouse and p-values were obtained from an unpaired two-tailed Student's t test).

**e** A20.GL tumor-bearing mice received  $3 \times 10^6$  CAR T cells i.v. and the percentage of MHC-II<sup>hi</sup> CD11c<sup>int</sup> migratory CD11b<sup>-</sup>CD103<sup>-</sup> DN (orange), CD11b<sup>-</sup>CD103<sup>+</sup> cDC1, and CD11b<sup>+</sup>CD103<sup>+</sup> cDC2 populations in the tumor-draining lymph node (tdLN) was analyzed on day 7.

**f** A20.GL tumor-bearing mice received  $3 \times 10^6$  CAR T cells i.v. and the percentage of MHC-II<sup>int</sup>CD11c<sup>hi</sup> resident CD11b<sup>-</sup>CD8 $\alpha$ <sup>-</sup> DN, CD11b<sup>-</sup>CD8 $\alpha$ <sup>+</sup> cDC1, and CD11b<sup>+</sup>CD8 $\alpha$ <sup>-</sup> cDC2 populations in the tdLN was analyzed on day 7.

Data in **e** and **f** is plotted as mean  $\pm$  SD and pooled from two independent experiments. Each dot represents one mouse (n=7/group) and p-values were obtained from an unpaired two-tailed Student's t test.

Source data are provided as a Source Data file.

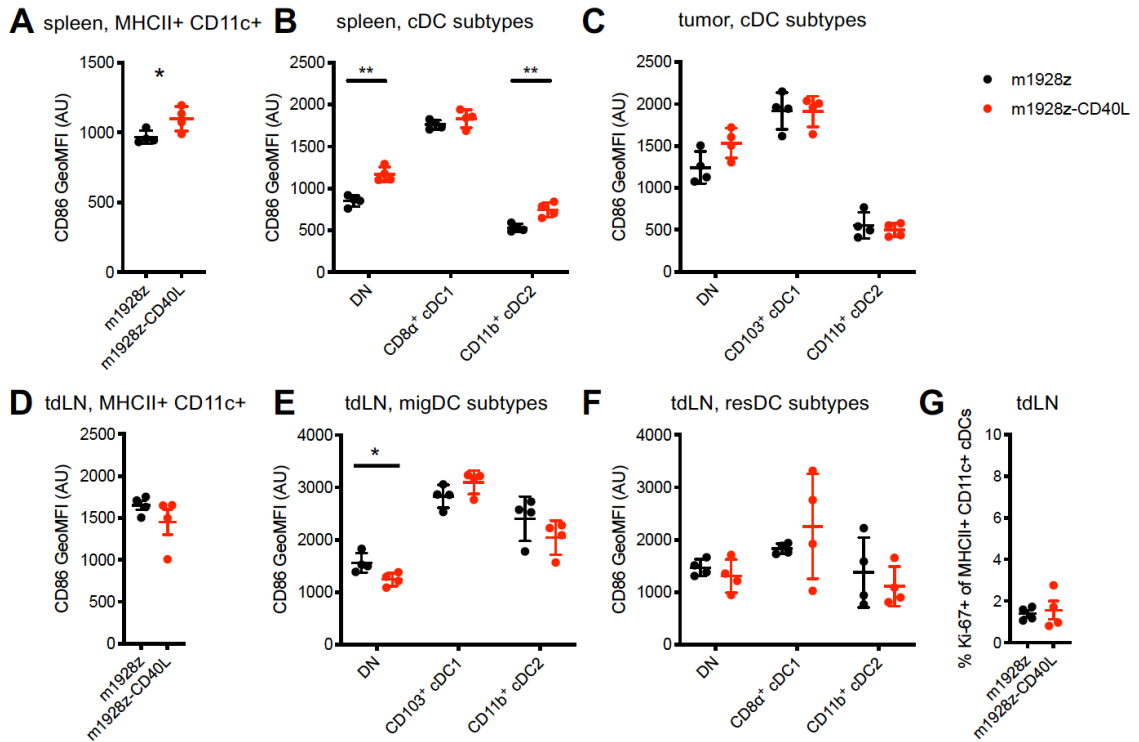

**Supplementary Figure 2. cDC1s in different tissues express highest levels of CD86 co-stimulatory molecule among cDCs**

**a** CD86 surface expression on splenic MHCII<sup>+</sup>CD11c<sup>+</sup> cDCs on day 7 after CAR T cell treatment in A20.GL tumor-bearing mice.

**b** and **c** CD86 surface expression on DN, cDC1, and cDC2 subsets on day 7 after CAR T cell treatment in A20.GL tumor-bearing mice in spleen (**b**) and tumor (**c**).

**d** CD86 surface expression on MHCII<sup>+</sup>CD11c<sup>+</sup> cDCs in the tumor-draining lymph node (tdLN) on day 7 after CAR T cell treatment in A20.GL tumor-bearing mice.

**e** and **f** CD86 surface expression on DN, cDC1, and cDC2 subsets on day 7 after CAR T cell treatment in A20.GL tumor-bearing mice in the tumor-draining lymph node (tdLN) on migratory DCs (**e**) and resident DCs (**f**).

**g** Percent of Ki-67<sup>+</sup> cells of all MHCII<sup>+</sup>CD11c<sup>+</sup> cDCs in the tdLN on day 7 after T cell treatment in A20.GL tumor-bearing mice.

Data is plotted as mean  $\pm$  SD and representative of 2-3 independent experiments. Each dot represents one mouse (n=4/group) and p-values were obtained from an unpaired two-tailed Student's t test.

Source data are provided as a Source Data file.

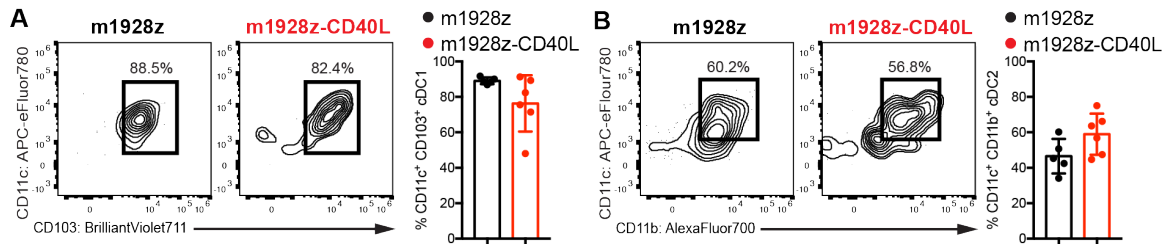

**Supplementary Figure 3. In vitro differentiation of tumor-derived cDC1 and cDC2 populations after CAR T cell treatment**

**a** and **b** CD45.2<sup>+</sup> A20.GL tumor-bearing mice were treated with  $3 \times 10^6$  CAR T cells i.v. and CD45.2<sup>+</sup>CD11b<sup>-</sup>CD103<sup>+</sup> cDC1s (**a**) and CD45.2<sup>+</sup>CD11b<sup>+</sup>CD103<sup>-</sup> cDC2s (**b**) were isolated from the tumor on day 3 by FACS. Sorted CD45.2<sup>+</sup> cDC1s or cDC2s cells were cultured in vitro on a CD45.1 bone-marrow stromal layer for 3 days and the percentage of CD11c<sup>+</sup>CD103<sup>+</sup> cDC1s (**a**) or CD11c<sup>+</sup>CD11b<sup>+</sup> cDC2s of all CD45.2<sup>+</sup> cells (**b**) was analyzed. Shown are representative contour plots and the quantification of the percentage of double-positive cells. Data is plotted as mean  $\pm$  SD and represents in vitro cultures from two mice collected from two independently performed experiments. Each dot represents one in vitro culture (m1928z, n=5; m1928z-CD40L, n=6).

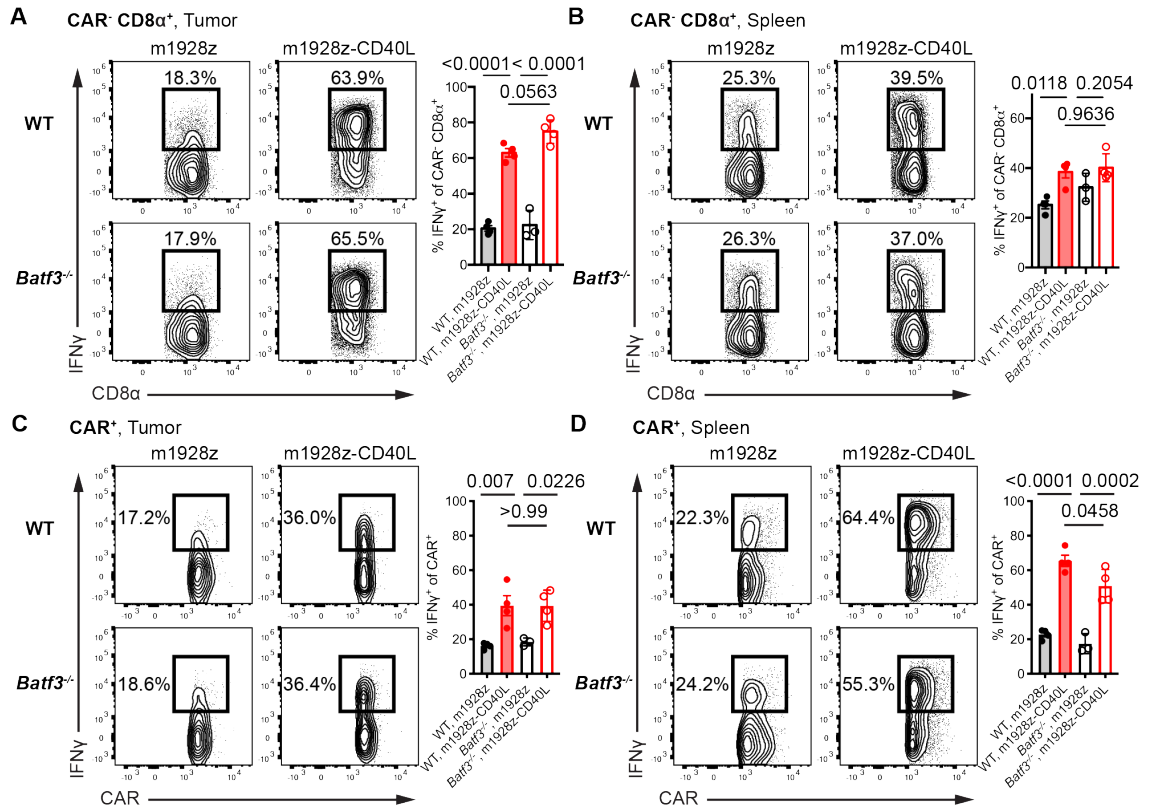

**Supplementary Figure 4. Lack of cDC1 population does not affect IFN $\gamma$  production of endogenous CD8<sup>+</sup> T cells or adoptively transferred CAR T cells**

BALB/c mice were injected intravenously (i.v.) with  $1 \times 10^6$  A20.GL cells followed by adoptive cell transfer (ACT) of  $3 \times 10^6$  CAR T cells 7 days after tumor challenge. The tumor and spleens were analyzed 7 days after ACT.

**a** Flow cytometry contour plots of CAR<sup>+</sup>CD8<sup>+</sup> T cells (CD45<sup>+</sup>CD19<sup>-</sup>CD11b<sup>-</sup>Gr-1<sup>-</sup>CD3<sup>+</sup>CAR<sup>+</sup> pre-gates) after 4 hours ex vivo PMA/ionomycin stimulation isolated from tumor (**a**) and spleen (**b**) of WT (top) or *Batf3*<sup>-/-</sup> (bottom) mice. IFN $\gamma$ -producing cells are highlighted by boxed in region. Percentage of IFN $\gamma$ <sup>+</sup> cell is summarized on the right.

**c** and **d** Same as in (**a** and **b**), except that the CAR<sup>+</sup> T cells were analyzed for IFN $\gamma$ -production. Percentage of IFN $\gamma$ <sup>+</sup> cells is summarized on the right. Each dot represents one mouse (WT m1928z, n=4; WT m1928z-CD40L, n=4; *Batf3*<sup>-/-</sup> m1928z, n=3; *Batf3*<sup>-/-</sup> m1928z-CD40L, n=4) and data is plotted as mean  $\pm$  SD. p-values were determined by two-way ANOVA test. Source data are provided as a Source Data file.

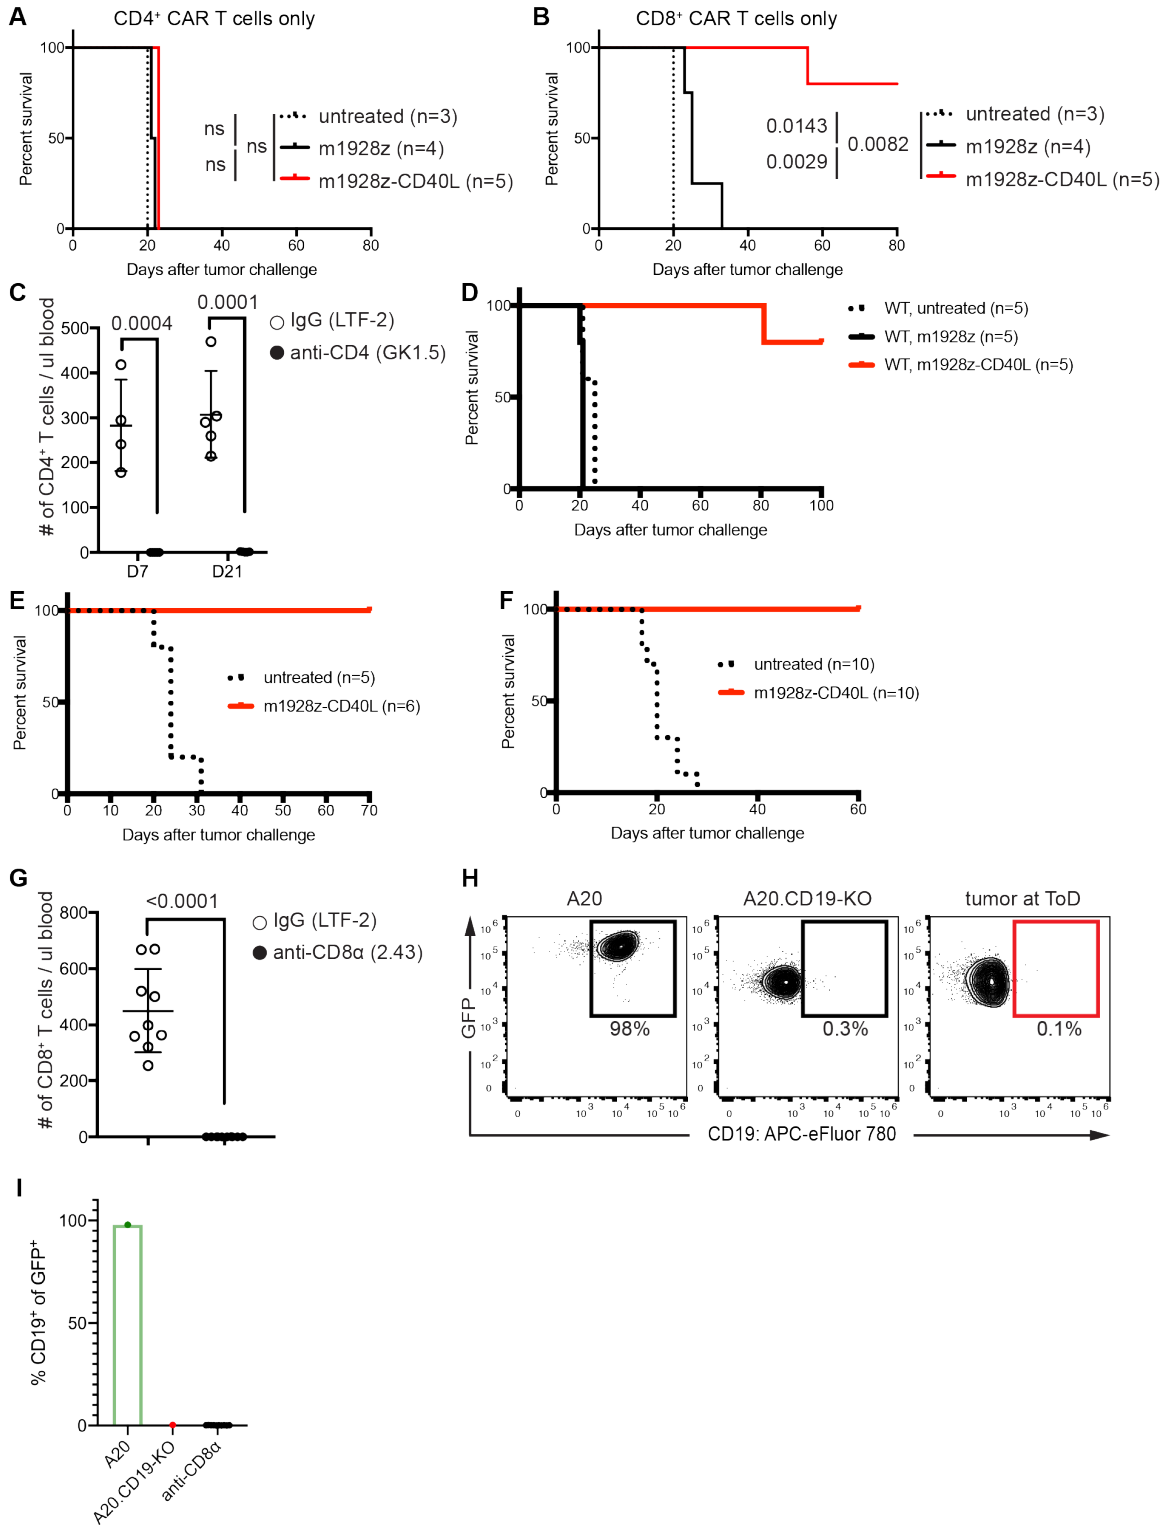

**Supplementary Figure 5. CD4<sup>+</sup> or CD8<sup>+</sup> CAR T cell treatment and CD4<sup>+</sup> or CD8<sup>+</sup> T cell depletion**

**a** and **b** Survival of BALB/c mice injected with  $1 \times 10^6$  A20.GL tumor cells i.v. on day 0 and treated with  $3 \times 10^6$  CD4<sup>+</sup> (**a**) or CD8<sup>+</sup> (**b**) CAR T cells i.v. on day 7. p-values were determined by a two-tailed log-rank (Mantel-Cox) test. ns, non-significant.

**c** Peripheral blood of m1928z-CD40L CAR T cell treated mice was collected retroorbitally and absolute numbers of CD4<sup>+</sup> T cells are plotted at time of adoptive cell transfer (D7) and two weeks later (D21). Mice were either treated with the IgG control antibody (LTF-2) or the CD4-depletion antibody (GK1.5). Each dot represents one mouse (D7 IgG, n=4; others, n=5/group) and data is plotted as mean ± SD.

**d, e, and f** Survival of BALB/c mice injected with  $1 \times 10^6$  A20.GL tumor cells i.v. on day 0 and treated with  $1-3 \times 10^6$  m1928z-CD40L CAR T cells i.v. on day 7. Three independent experiments are plotted in (**d-f**).

**g** Peripheral blood of long-term surviving mice day 15 after CD8<sup>+</sup> T cell depletion was collected retroorbitally and absolute numbers of CD8<sup>+</sup> T cells are plotted. Mice were either treated with the IgG control antibody (LTF-2) or the CD8-depletion antibody (2.43). Each dot represents one mouse (IgG/LTF-2, n=9; anti-CD8 $\alpha$ /2.43, n=10) and data is plotted as mean ± SD. p-values in (**c**) and (**d**) were obtained from an unpaired two-tailed Student's t-test.

**h** Surface CD19 expression on GFP<sup>+</sup> tumor cells at time-of-death (ToD) analyzed by flow cytometry and shown for one representative mouse in the CD8<sup>+</sup> T cell depleted cohort.

**i** Summary of CD19 expression on GFP<sup>+</sup> tumor cells (black) of all mice at ToD in the CD8<sup>+</sup> T cell depleted cohort. All mice had tumors that were CD19-negative at ToD. CD19 levels of the A20.GL cell line (green) and A20.CD19-KO cell line (red) are plotted as a reference. Source data are provided as a Source Data file.



## Supplementary Tables

Supplementary Table 1: Antibodies, reagents, assays, and software.

| REAGENT or RESOURCE                                      | SOURCE      | IDENTIFIER                   |
|----------------------------------------------------------|-------------|------------------------------|
| Antibodies                                               |             |                              |
| TruStain fcX (anti-mouse CD16/32)                        | BioLegend   | Cat# 101319, RRID:AB_1574973 |
| anti-mouse CCR7 (clone 4B12) PE                          | BioLegend   | 120105                       |
| anti-mouse CD3 $\epsilon$ (clone 145-2C11) PE-eFluor 610 | eBioscience | 61-0031, RRID:AB_2574514     |
| anti-mouse CD4 (GK1.5) AlexaFluor 700                    | eBioscience | 56-0041, RRID:AB_493999      |
| anti-mouse CD8 $\alpha$ (53-6.7) APC-eFluor 780          | eBioscience | 47-0081, RRID:AB_1272185     |
| anti-mouse/human CD11b (M1/70) AlexaFluor 700            | eBioscience | 56-0112, RRID:AB_657585)     |
| anti-mouse CD11c (N418) APC-eFluor 780                   | eBioscience | 47-0114, RRID:AB_1548663     |
| anti-mouse CD19 (eBio1D3) APC-eFluor 780                 | eBioscience | 47-0193, RRID:AB_10853189    |
| anti-mouse CD19 (eBio1D3) PE                             | eBioscience | 12-0193, RRID:AB_657661      |
| anti-mouse CD19 (eBio1D3) PE-eFluor 610                  | eBioscience | 61-0193, RRID:AB_2574536     |
| anti-mouse CD40 (1C10) PerCP-eFluor 710                  | eBioscience | 46-0401, RRID:AB_2573677     |
| anti-mouse CD40L (MR1) PE                                | eBioscience | 12-1541, RRID:AB_465887      |
| anti-mouse CD45 (30-F11) BV605                           | BioLegend   | 103139, RRID:AB_2562341      |
| anti-mouse CD45 (30-F11) PE-Cy7                          | eBioscience | 25-0451, RRID:AB_469625      |
| anti-mouse CD45.1 (A20) PE-eFluor610                     | eBioscience | 61-0453, RRID:AB_2574560     |
| anti-mouse CD45.2 (104) PE-Cy7                           | eBioscience | 25-0454, RRID:AB_2573350     |
| anti-mouse CD103 (2E7) BV711                             | BioLegend   | 121435, RRID:AB_2686970      |
| anti-mouse IFN $\gamma$ (XMG1.2) PE-Cy7                  | eBioscience | 25-7311, RRID:AB_1257211     |
| anti-mouse IRF8 (V3GYWCH) PerCP-eFluor710                | eBioscience | 46-9852                      |
| anti-mouse Ki-67 (SolA15) PE-eFluor610                   | eBioscience | 61-5698                      |

|                                                               |                                       |                           |
|---------------------------------------------------------------|---------------------------------------|---------------------------|
| anti-mouse Ly-6G/Ly-6C (Gr-1) (RB6-8C5) PE-eFluor 610         | eBioscience                           | 61-5931, RRID:AB_2574639  |
| anti-mouse Ly-6G/Ly-6C (Gr-1) (RB6-8C5) PE-Cy7                | eBioscience                           | 25-5931, RRID:AB_469662   |
| anti-mouse MHC class II (MHC-II) I-A/I-E (M5/114.15.2) BV510  | BioLegend                             | 107635, RRID:AB_2561397   |
| anti-human Myc-tag (9B11) AlexaFluor 647                      | Cell Signaling                        | 2233S, RRID:AB_10693328   |
| anti-mouse NKp46 (29A1.4)                                     | eBioscience                           | 46-3351, RRID:AB_1834442  |
| anti-mouse CD4 (GK1.5)                                        | BioXCell                              | BE0003-1, RRID:AB_1107636 |
| anti-mouse CD8 $\alpha$ (2.43)                                | BioXCell                              | BE0061                    |
| Chemicals, Peptides, and Recombinant Proteins                 |                                       |                           |
| Cell Stimulation Cocktail (plus Protein Transport Inhibitors) | eBioscience                           | 00-4975                   |
| LIVE/DEAD Fixable Violet Dead Cell Stain Kit                  | Thermo Fisher                         | L34955                    |
| RetroNectin Recombinant Human Fibronectin Fragment            | Takara                                | T100B                     |
| D-Luciferin, Potassium Salt (Proven and Published)            | Gold Biotechnology                    | LUCK-1G                   |
| Recombinant murine Flt3-Ligand                                | Peprtech                              | 250-31L                   |
| Recombinant murine GM-CSF                                     | Peprtech                              | 315-03                    |
| Recombinant human IL-2 (Proleukin/Aldesleukin)                | Prometheus Therapeutics & Diagnostics | NDC 65483-116-07          |
| Critical Commercial Assays                                    |                                       |                           |
| EasySep™ Mouse T Cell Isolation Kit                           | Stemcell Technologies                 | 19851                     |
| Fixation/Permeabilization Solution Kit                        | BD Biosciences                        | 554714                    |
| 123count eBeads Counting Beads                                | eBioscience                           | 01-1234-42                |
| Experimental Models: Cell Lines                               |                                       |                           |
| Human: Phoenix-ECO                                            | ATCC                                  | CRL-3214, RRID:CVCL_H717  |
| Mouse: A20 lymphoma cell line                                 | ATCC                                  | TIB-208, RRID:CVCL_1940   |
| Mouse: A20.GL                                                 | Kuhn et al., 2019                     | N/A                       |
| Mouse: A20.CD19-KO                                            | Kuhn et al., 2019                     | N/A                       |

| Experimental Models: Organisms/Strains           |                        |                                                                                                                                                                               |
|--------------------------------------------------|------------------------|-------------------------------------------------------------------------------------------------------------------------------------------------------------------------------|
| Mouse: BALB/cAnN                                 | Charles Rivers         | CR: 028; RRID:MGI:5654849                                                                                                                                                     |
| Mouse: CBy.PL(B6)- <i>Thy1<sup>a</sup></i> /ScrJ | The Jackson Laboratory | JAX: 005443;<br>RRID:IMSR_JAX:005443                                                                                                                                          |
| Mouse: C.129S- <i>Batf3<sup>tm1Kmm</sup></i> /J  | The Jackson Laboratory | JAX: 013756;<br>RRID:IMSR_JAX:013756                                                                                                                                          |
| Recombinant DNA                                  |                        |                                                                                                                                                                               |
| Plasmid: SFG                                     | This study             | N/A                                                                                                                                                                           |
| Software and Algorithms                          |                        |                                                                                                                                                                               |
| GraphPad Prism v7                                | GraphPad               | <a href="https://www.graphpad.com/scientific-software/prism/">https://www.graphpad.com/scientific-software/prism/</a>                                                         |
| FlowJo Version 10                                | FlowJo LLC             | <a href="https://www.flowjo.com/">https://www.flowjo.com/</a>                                                                                                                 |
| Living Image v2.60                               | PerkinElmer            | <a href="https://www.perkinelmer.com/product/spectrum-200-living-image-v4series-1-128113">https://www.perkinelmer.com/product/spectrum-200-living-image-v4series-1-128113</a> |
