# Supplementary material for: CD103+ cDC1 and endogenous CD8+ T cells are necessary for improved CD40L-overexpressing CAR T cell antitumor function
Source: PubMed Central journal article supplement (PMC7710757; doi:10.1038/s41467-020-19833-3), 2020-12-02
Supplement: 41467_2020_19833_MOESM2_ESM.pdf [file 41467_2020_19833_MOESM2_ESM.pdf]

Reviewers' comments:

Reviewer #1, expert on CAR-T cells (Remarks to the Author):

Kuhn and colleagues report the results of a mouse study in which they have administered T-cells co-expressing a CD19 CAR and CD40L and show that ablation of the cDC1 subsets reduces the anti-tumor activity of adoptively transferred T-cells using the disseminated A20 lymphoma model. The authors also show the evidence of endogenous T-cell response directed at non-CD19 antigens which is boosted by the CD40L expression on CAR T-cells. Overall, the work is done at a high technical level but the following limitations severely limit interpretation of the results as well as interest to the general audience.

1. The report is an extension of the previously published work, in which the authors already described phenotypic changes in the DC subsets and stimulation of the endogenous CD8 T-cell response. For the full understanding/interpretation, readers have to read the prior report, and the current manuscript falls short as a standalone paper. The authors should include fundamental findings such as the enhanced anti-tumor activity, subset phenotype and the status of the endogenous T-cell response in the experiments shown in this report as separate panels. Otherwise the report appears orphaned and the significance unclear.

2. The authors conclude that the enhanced function of CD40L-expressing CAR T-cells is mediated in principle via the Batf3-dependent DC subset. However, the data does not fully support this conclusion as deletion of Batf3 (and the cDC1 subset) also severely impairs stimulation of endogenous CD8+ T-cell response (Fig. 3D, E) and erases any survival advantage (Fig. 2B) by the control CD19 CAR T-cells. This strongly indicates the cDC1 subset is critical for the anti-tumor function of CAR T-cells, regardless of the CD40L expression. In light of this, the main finding of this paper is that Batf3 expression in the host is critical for the priming/generation of endogenous CD8+ T-cell responses against immunogenic targets, likely by promoting the development of the cDC1 cell subset, and that this endogenous CD8+ T-cell response can be further boosted by CD40 stimulation. Unfortunately, this knowledge has been previously established in various studies of DC in mouse models, and therefore this report is confirmatory (now using a CAR T-cell model) rather than exploratory.

3. If we assume that the main contribution of Batf3 in this model is indeed the generation of cDC1, it is still unclear whether the other subset (cDC2) plays any role in stimulating the immune response. This is important because cDC2 is still the prevalent DC subset in both tumor and the spleen, as shown in Fig. 1. Would *Ltbr*<sup>-/-</sup> mice show the same defect?

4. It is unclear how the CD19 CAR T-cells affect the cDC1/cDC2 balance. Do cDC2 convert to cDC1 in the presence of CAR T-cells? Do CD19 CAR T create an inflammatory environment that attracts cDC1 from LN or converts monocytes to cDC1? Do CD19 CAR T-cells stimulate proliferation of cDC1?

5. Lymphoma, especially when administered iv, does not usually establish solid masses with high stromal development and immunosuppressive environment as many bona fide solid tumors do. Therefore, it is unclear whether this mechanism will be observed in "real" solid tumor models.

Minor points:

1. Figure 2A should have statistical analysis in addition to the representative contour plots

2. In Fig 3, Student's t test cannot be used when several groups are compared. A one-way ANOVA should be used instead and corrected for multiple comparisons.

Reviewer #2, expert on tumor antigen presentation (Remarks to the Author):

The authors of the manuscript entitled "CD103+ Dendritic Cells and Endogenous CD8+ T Cells are Necessary for CD40 Ligand-Modified CAR T Cell Function" have shown previously that treatment with CD40L CAR T cells improves tumor control through direct CD40/CD40L mediated cytotoxicity and indirect induction of non-CAR T cell immunity that recognizes tumor cells. In the current study, the cell populations responsible for the induction of non-CAR CD8 T cell immunity is investigated in more detail and a role for Batf3-restricted DCs (cDC1) promoting this response is identified. This finding is not surprising given the extensive literature on the ability of cDC1 to cross-present antigens to the CD8 T cell compartment. The authors speculate the main CD8 T cell priming event occurs within the tumor tissue, but from the data presented there is no evidence to directly support this conclusion. While data presented indicates the endogenous tumor-specific T cell population generated may provide protective antitumor memory, alternative interpretations can be drawn from the limited experiments performed. Although I find the study interesting, there are major issues with the experimental design and interpretation of results versus the conclusions being drawn – many possible interpretations are present and should be carefully considered. The manuscript is preliminary, also very descriptive and does not provide any mechanistic insights.

1. Although the authors show increases in the proportion of cDC1 in the tumor following CD40L CAR T treatment, there is no evidence to suggest priming of the endogenous compartment is occurring within this site. Further experiments are warranted to draw this conclusion. Furthermore, why was analysis of the tumor-draining lymph node(s) excluded throughout the study? This would be the most logical site for CD8 T cell priming.
2. Statistical analysis in Figure 3E is not shown for the two treatment arms in Batf3<sup>-/-</sup> mice. Elevated levels of tumor-specific CD8 T cells appear to be present in the CD40L CAR T group as compared to the control. How are these CD8 T cells being primed in the absence of cDC1?
3. Alternative explanations for the data presented in Figure 4 are possible. For example, protective immunity may be dependent on the presence of the CD40L CAR T cells during rechallenge – with the CAR T essential for promoting re-expansion post challenge and/or involved in direct CD40/CD40L killing. Experiments to exclude these possibilities should be performed: e.g. depletion of the CAR T cells by targeting the congenic marker and/or transfer of endogenous CD8 T cells to a new host prior to rechallenge.
4. . Are tumor-specific tissue-resident memory cells formed and if so, are they effectively depleted prior to rechallenge?
5. The data presented appears preliminary with some experiments having as few as 2 mice/group. Can reliable statistical analysis be performed on such a small sample size? Rechallenge experiments (Figure 4D) required 19 mice – why are only five mice shown in the initial treatment data? Have the investigators repeated any of these findings to demonstrate reproducibility?
6. How broad is the endogenous T cell response generated?
7. How are the transferred CD40L CAR T modulating the cDC1 compartment?
8. Why is the ratio of cDC1 to cDC2 different at differing sites – was this also observed in the tumor-

draining lymph nodes?

Reviewer #3, expert on CAR-T cells (Remarks to the Author):

In this manuscript Kuhn and colleagues describe a followup study from a recent manuscript (Kuhn et al, Cancer Cell, 2019) in which they demonstrate that coexpression of CD40-ligand on CAR T cells enhances their activity, decreases the needs for lymphodepletion, and increases the endogenous T cell response, allowing for elimination of antigen negative tumor cells. In the current manuscript, the authors use a BATF3- KO mouse model (which lacks type 1 conventional dendritic cells) in order to elucidate the mechanism of how overexpression of CD40L on syngeneic CAR T cells results in enhanced efficacy. While the KO model is interesting and does provide a small window of mechanistic insight to the previously reported finding of enhancement of the endogenous immune response, it does not explain all of the improved efficacy obtained by using the CD40L CAR T cells. Additionally, the previously published manuscript already showed that CD40L+ CAR T cells license dendritic cells (and that their increased activity was ablated in CD40 KO mice), thus it is not completely surprising that in this current manuscript that these CD40L+ CAR T cells prime CD8 cells. Overall, this paper is interesting but does not substantially add fundamentally new knowledge about the function or mechanism of CD40L+ CAR T cells.

Figure 1:

Figure B/C- This difference in DC recruitment by CAR T cells overexpressing CD40L vs those that do not to tumor vs peripheral lymphoid tissue was already previously shown in the last publication.

Figure D -What is new and nicely demonstrated here is that the makeup of the dendritic cell types is different for mice treated with CD40L+ CAR T cells with cDC1 being a larger proportion in the tumor and cDC2 being a larger proportion in the periphery. However, the authors do not dive into the larger questions of what this means. What is the role of cDC1 v cDC2 in the periphery? Do those matter or is this merely an observation?

Figure 2: This is a very small figure, can likely be combined with figure 1. The level of the effect here of BATF3-KO is small. The KM curves are somewhat similar (though there are a number of mice cured in WT and not BATF3-KO, those mice that do die of tumor do so at similar times). Additionally, the CD40L+ CAR T cells maintain greater activity compared to traditional CAR T cells even in BATF3-KO mice. Why is this? What is the mechanism other than dendritic cell priming of T cells? The authors go down the mechanism of the cDC1 priming, but this is only a small part of the mechanism of why CD40L+ CAR T cells are superior (and one that had been explored previously). Additionally, I wonder whether the BATF3-KO mice have cDC2? If so, are they still increased in the periphery when treated with CD40L+ CAR T cells?

Figure 3:

3A-B: Here, the authors first show that endogenous T cells obtained from mice treated with CD40L+ CAR T cells make more cytokine in response to PMA/Ionomycin stimulation than endogenous T cells obtained from mice treated with traditional CAR T cells in both WT and BATF3-KO mice. This would indicate that the CD40L+ CAR T cells somehow stimulate or prime the other T cells to be more effective-would be nice to look at this mechanism as it could account for most of the reason CD40L+ CAR T cells are superior to traditional CARs.

3C-E: They also used congenic markers to analyze the cytokine produced by endogenous T cells obtained from these mice in response to tumor. Here, they say that the endogenous cells in mice

treated with CD40L+ CARs are only superior to mice treated with regular CARs in those mice that are WT and not BATF3-KO. However, that does not appear to be supported by the data. In 3D, the ELISpots do appear to be more abundant in the bottom right than bottom left. Additionally, though it may not be statistically significant likely due to high variability, the numbers in 3E are clearly greater for CD40L+ CAR treated BATF3-KO mice than those treated with regular CAR T cells. Thus again, CD40L CAR T cells seem to have an effect on endogenous CAR T cells that is not dependent on cDC1, and this should be investigated more thoroughly. The more significant difference here seems to be that overall there is a decrease in cytokine produced by endogenous T cells from BATF3 KO mice. This may be due to cDC1 deletion, but BATF3-KO can have other effects on immune cells, so this should be confirmed after antibody depletion of cDC1.

Figure 4: I have no comments, this is well performed, but frankly not entirely surprising that CD8 depletion would prevent tumor rejection.

Reviewers' comments:

Reviewer #1, expert on CAR-T cells (Remarks to the Author):

61 Kuhn and colleagues report the results of a mouse study in which they have  
62 administered T-cells co-expressing a CD19 CAR and CD40L and show that  
63 ablation of the cDC1 subsets reduces the anti-tumor activity of adoptively  
64 transferred T-cells using the disseminated A20 lymphoma model. The authors  
65 also show the evidence of endogenous T-cell response directed at non-CD19  
66 antigens which is boosted by the CD40L expression on CAR T-cells. Overall, the  
67 work is done at a high technical level but the following limitations severely limit  
68 interpretation of the results as well as interest to the general audience.

69

70 1. The report is an extension of the previously published work, in which the  
71 authors already described phenotypic changes in the DC subsets and stimulation  
72 of the endogenous CD8 T-cell response. For the full understanding/interpretation,  
73 readers have to read the prior report, and the current manuscript falls short as a  
74 standalone paper. The authors should include fundamental findings such as the  
75 enhanced anti-tumor activity, subset phenotype and the status of the  
76 endogenous T-cell response in the experiments shown in this report as separate  
77 panels. Otherwise the report appears orphaned and the significance unclear.

78 We appreciate the comments of Reviewer #1 and agree by adding additional  
79 data to the revised manuscript describing the immunophenotype of the cDC1 and  
80 cDC2 subsets (Figure 1E and Supplementary Figure 2A-D) in spleen, primary  
81 tumor tissue (=liver), and the tumor-draining lymph nodes (=coeliac & portal LNs;  
82 (1)). We have taken the reviewer's advice and report the enhanced antitumor  
83 activity of m1928z-CD40L CAR T cells in WT and *Batf3*<sup>-/-</sup> mice as separate  
84 panels (Fig. 2A and 2B). The decreased antitumor response of m1928z-CD40L  
85 CAR T cells in cDC1-lacking *Batf3*<sup>-/-</sup> mice is emphasized in a separate panel as  
86 well (Fig. 2C). Also, as suggested, the status of both the endogenous and  
87 adoptively transferred T cells is shown as separate panels in the revised  
88 manuscript (Supplementary Figure 4).

89

90 2. The authors conclude that the enhanced function of CD40L-expressing CAR

91 T-cells is mediated in principle via the Batf3-dependent DC subset. However, the  
92 data does not fully support this conclusion as deletion of Batf3 (and the cDC1  
93 subset) also severely impairs stimulation of endogenous CD8+ T-cell response  
94 (Fig. 3D, E) and erases any survival advantage (Fig. 2B) by the control CD19  
95 CAR T-cells. This strongly indicates the cDC1 subset is critical for the anti-tumor  
96 function of CAR T-cells, regardless of the CD40L expression. In light of this, the  
97 main finding of this paper is that Batf3 expression in the host is critical for the  
98 priming/generation of endogenous CD8+ T-cell responses against immunogenic  
99 targets, likely by promoting the development of the cDC1 cell subset, and that  
100 this endogenous CD8+ T-cell response can be further boosted by CD40  
101 stimulation. Unfortunately, this knowledge has been previously established in  
102 various studies of DC in mouse models, and therefore this report is confirmatory  
103 (now using a CAR T-cell model) rather than exploratory.

104 We agree with the reviewer's comment that previous work has established the  
105 importance of the cDC1 subset in various antitumor responses (2,3). Additionally,  
106 previous reports have both shown the technical feasibility of therapeutically  
107 enhancing the endogenous T cell antitumor response by pharmacologically  
108 increasing the cDC1 numbers in the tumor tissue of preclinical mouse models  
109 (4); as well as a positive correlation between immune checkpoint blockade  
110 responses in cancer patients and cDC1 numbers in human tumor samples (5,6).  
111 Thus, our report is focused on highlighting the feature of the armored CAR,  
112 m1928z-CD40L, which combines the cytotoxic antitumor function of a CAR with  
113 the ability of actively recruiting cDC1s to the tumor site in one treatment modality.  
114 We would like to point out that the antitumor effect of control m1928z CAR T cells  
115 is not affected by deletion of Batf3 (Fig. 2B).

116 Whereas previous reports from our lab have documented the improved  
117 antitumor response and general stimulation of certain immune effectors, here, we  
118 report the specific relevance of the cDC1-CD8 T cell axis in CD40L-armored  
119 CAR-treated mice. Armored CAR T cells can optimize and have been  
120 demonstrated to improve the antitumor response. Here we provide a mechanistic

121 insight as to how these CD40L-armed CAR T cells function. We have added  
122 data and a complete figure (Figure 3) highlighting the effect of CD40L-armed  
123 CAR T cells on the intratumoral conventional DC population: stimulation of  
124 tumor-resident CD11b<sup>-</sup> CD103<sup>-</sup> double-negative (DN) cDCs to proliferate,  
125 upregulate IRF8, and differentiate to cDC1s. Thus, we would like to emphasize  
126 that this report goes beyond being just confirmatory and demonstrating how  
127 CD40L-CAR T cells increase the intratumoral cDC1-to-cDC2 ratio.

128

129 3. If we assume that the main contribution of *Batf3* in this model is indeed the  
130 generation of cDC1, it is still unclear whether the other subset (cDC2) plays any  
131 role in stimulating the immune response. This is important because cDC2 is still  
132 the prevalent DC subset in both tumor and the spleen, as shown in Fig. 1. Would  
133 *Ltbr*<sup>-/-</sup> mice show the same defect?

134 We acknowledge the reviewer's point that the importance of the cDC2 subset is  
135 not directly assessed in our system. So far, evaluating the involvement of cDC2s  
136 in the antitumor response has been challenging in the field. No equivalent  
137 knockout mouse or other experimental tool currently exists that faithfully and  
138 systemically only depletes the cDC2 population in mice. Whereas *Notch2*<sup>flox/flox</sup>  
139 *Itgax-cre* mice lack cDC2 cells in spleen and small intestine lamina propria, other  
140 tissues are not depleted of cDC2s, and cDC1s also display a different  
141 transcriptional profile when *Notch2* is knocked out in these mice (7,8). Similar  
142 results were reported in mice lacking the transcription factor *Irf4*, which is  
143 necessary for proper cDC2 development. Genetic ablation of *Irf4* in mice  
144 generally decreased cDC2 numbers and impaired their function to migrate to  
145 lymph nodes, but did not completely ablate them systemically (9,10). Besides  
146 *Batf3*<sup>-/-</sup> mice, which specifically affect the development of one immune cell  
147 subtype (=cDC1; (3)), other knockout mice are warranted to assess the  
148 involvement of other DC subtypes in antitumor responses.

149 We appreciate the reviewer's suggestion of using *Ltbr*<sup>-/-</sup> mice. Mice lacking the  
150 lymphotoxin beta receptor have a defective secondary lymphoid compartment,

151 do not develop lymph nodes, have disorganized splenic B cell follicles, and  
152 defective DC homeostasis (11,12). Thus, one would not be able to attribute any  
153 potential antitumor defect in *Ltbr*<sup>-/-</sup> mice to a specific DC subtype. We have added  
154 a paragraph regarding cDC2 depletion in the results section.

155

156 4. It is unclear how the CD19 CAR T-cells affect the cDC1/cDC2 balance. Do  
157 cDC2 convert to cDC1 in the presence of CAR T-cells? Do CD19 CAR T create  
158 an inflammatory environment that attracts cDC1 from LN or converts monocytes  
159 to cDC1? Do CD19 CAR T-cells stimulate proliferation of cDC1?

160 We would like to thank the reviewer for this comment and investigated the  
161 impact of CAR T cell treatment on the cDC1/cDC2 balance. This additional  
162 analysis was added to the revised manuscript as a separate figure (Figure 3).

163 This question prompted us to assess how the different CAR T cell treatments  
164 affect the cDC subpopulations. Common dendritic cell precursors (CDPs) in the  
165 bone marrow differentiate to recently identified “pre-cDC1s” and “pre-cDC2s”  
166 (13,14). Schlitzer et al. could show that isolated pre-cDC1s and pre-cDC2s from  
167 the bone marrow specifically differentiated to mature cDC1s and cDC2s,  
168 respectively, in the periphery after pre-cDC transfer into a naïve host (13). This  
169 inspired us to analyze any potential changes in CDP, pre-cDC1, and pre-cDC2  
170 populations in the bone marrow (=site of DC-poiesis) of CAR T cell treated mice,  
171 which would potentially explain the changes we see in the periphery. However,  
172 both m1928z and m1928z-CD40L CAR T cell-treated mice had unchanged CDP  
173 and pre-cDC populations in the bone marrow (data not shown). A recently  
174 published report using adoptively transferred T cells expressing Flt3L showed  
175 that numbers of bone marrow-resident pre-cDCs can be therapeutically  
176 increased, resulting in higher numbers of CD103<sup>+</sup> DCs in the tumor (15).

177 In contrast, our findings suggested that any changes in cDC1/cDC2 ratios we  
178 see in the periphery, are stimulated independently of pre-cDC development in the  
179 bone marrow. Focusing on the peripheral, differentiated cDC populations, we  
180 next assessed the expression of the IRF8 transcription factor in tumor-derived



181 cDC populations. In the periphery, IRF8 controls survival and function of  
182 terminally differentiated cDC1s (16,17). Furthermore, increased IRF8 expression  
183 in CD11b<sup>-</sup> CD103<sup>-</sup> double-negative (DN) cells was shown to promote their  
184 differentiation into mature CD103<sup>+</sup> cDC1s (4). Thus, we hypothesized that  
185 CD40L-CAR T cell treatment skews the cDC1/cDC2 ratio towards the cDC1  
186 populations by stimulating the DN cells to expand, upregulate IRF8, and  
187 differentiate into cDC1s. We specifically noticed upregulation of IRF8 (readout of  
188 DN-to-cDC1 differentiation) and Ki-67 (readout for proliferation) in DN cells  
189 treated with CD40L-CAR T cell-treated mice (Fig 3B). The increased expression  
190 of Ki-67 in the tumor-derived DN cells also correlated with the observed increase  
191 of the DN population in the tumor of CD40L-CAR T cell-treated mice (Fig 1F),  
192 indicating that DN cells receive a proliferative signal upon CD40L-CAR T cell  
193 treatment. Intriguingly, splenic DN cells and DN cells from the tdLNs did not  
194 upregulate Ki-67 or IRF8 (Figures 3C and 3D), implying a tumor-specific effect.

195 Next, we wanted to assess if IRF8 upregulation in the DN population leads to  
196 DN-to-cDC1 differentiation. To address this, DN cells were isolated by FACS  
197 from tumors of m1928z and m1928z-CD40L CAR T cell-treated mice and  
198 cultured ex vivo for 3 days to assess their potential to differentiate to cDC1s  
199 without any further stimuli. Both, DN cells from m1928z and m1928z-CD40L CAR  
200 T cell-treated mice differentiated into cDC1s ex vivo, albeit DN cells from  
201 m1928z-CD40L CAR T cell-treated mice differentiated 2x more efficiently  
202 compared to m1928z CAR T cell-treated mice (Figure 3E). Together, this  
203 suggests that CD40L-CAR T cells affect the intratumoral cDC1/cDC2 ratio by  
204 stimulating CD11b<sup>-</sup> CD103<sup>-</sup> DN cell proliferation, upregulation of the cDC1-  
205 skewing IRF8 transcription factor, and, consequently, differentiation of DN cDCs  
206 to cDC1s in the tumor tissue.

207 Additionally, to address the reviewer's question about cDC1-to-cDC2 trans-  
208 differentiation, we did not detect any IRF8 upregulation in cDC2s (data not  
209 shown). However, in the ex vivo culture system, a small percentage of cDC2s  
210 (~1/6<sup>th</sup>) did give rise to cDC1s (Supplementary Figure 3B), suggesting that this

211 trans-differentiation is possible. This was observed in DN populations of both  
212 m1928z and m1928z-CD40L CAR T cell-treated mice, indicating that this effect is  
213 not specific to either CAR T cell treatment cohort.

214 Also, regarding the question of proliferation of cDC populations after CAR  
215 treatment, Ki-67 staining showed that, both, cDC1s and cDC2s proliferated more  
216 after CD40L-CAR T cell treatment (Figures 3F and 3G). Thus, CD40L-CAR T  
217 cells do not specifically stimulate the cDC1 population, but instead affect the  
218 intratumoral DN progenitors. Why this increased proliferation of cDC subsets in  
219 the tumor does not translate to an increase in overall numbers (Figure 1C), is  
220 addressed in the discussion section of the revised manuscript.

221

222 5. Lymphoma, especially when administered iv, does not usually establish solid  
223 masses with high stromal development and immunosuppressive environment as  
224 many bona fide solid tumors do. Therefore, it is unclear whether this mechanism  
225 will be observed in "real" solid tumor models.

226 We agree with the reviewer's comment that our lymphoma model does not  
227 recapitulate a bona fide immunosuppressive TME. Pairing the CD40L platform  
228 with a CAR targeting a solid tumor in a syngeneic mouse model is warranted to  
229 address this question but beyond the scope of this manuscript. The presented  
230 data is still relevant to current CAR T cell trials, as clinical data using non-  
231 armored anti-CD19 CAR T cells in B cell malignancies requires further  
232 improvement.

233

234 Minor points:

235 1. Figure 2A should have statistical analysis in addition to the representative  
236 contour plots

237 We have added the statistical analysis matching the representative contour  
238 plots.

239 2. In Fig 3, Student's t test cannot be used when several groups are compared. A  
240 one-way ANOVA should be used instead and corrected for multiple comparisons.

241 We thank the reviewer for pointing out the correct statistical analysis. We have  
242 revised the figure accordingly. The cytokine stimulation data can now be found  
243 under Supplementary Figure 4, whereas the ELIspot data was removed.

244 Reviewer #2, expert on tumor antigen presentation (Remarks to the Author):

245 The authors of the manuscript entitled “CD103+ Dendritic Cells and  
246 Endogenous CD8+ T Cells are Necessary for CD40 Ligand-Modified CAR T Cell  
247 Function” have shown previously that treatment with CD40L CAR T cells  
248 improves tumor control through direct CD40/CD40L mediated cytotoxicity and  
249 indirect induction of non-CAR T cell immunity that recognizes tumor cells. In the  
250 current study, the cell populations responsible for the induction of non-CAR CD8  
251 T cell immunity is investigated in more detail and a role for Batf3-restricted DCs  
252 (cDC1) promoting this response is identified. This finding is not surprising given  
253 the extensive literature on the ability of cDC1 to cross-present antigens to the  
254 CD8 T cell compartment. The authors speculate the main CD8 T cell priming  
255 event occurs within the tumor tissue, but from the data presented there is no  
256 evidence to directly support this conclusion. While data presented indicates the  
257 endogenous tumor-specific T cell population generated may  
258 provide protective antitumor memory, alternative interpretations can be drawn  
259 from the limited experiments performed. Although I find the study interesting,  
260 there are major issues with the experimental design and interpretation of results  
261 versus the conclusions being drawn – many possible interpretations are present  
262 and should be carefully considered. The manuscript is preliminary, also very  
263 descriptive and does not provide any mechanistic insights.

264

265 1. Although the authors show increases in the proportion of cDC1 in the tumor  
266 following CD40L CAR T treatment, there is no evidence to suggest priming of the  
267 endogenous compartment is occurring within this site. Further experiments are  
268 warranted to draw this conclusion. Furthermore, why was analysis of the tumor-  
269 draining lymph node(s) excluded throughout the study? This would be the most  
270 logical site for CD8 T cell priming.

271 We appreciate the reviewer’s suggestion to analyze the tumor-draining lymph  
272 nodes (tdLNs) and have included data reporting differences in m1928z and  
273 m1928z-CD40L CAR T cell-treated mice in the revised manuscript.

274 As primary tumor growth occurs in the liver after i.v. injection of A20 lymphoma  
275 cells, we focused our analysis on the coeliac and portal LNs, which drain the liver  
276 tissue in mice (1). The changes in cDC subtype ratio in the tdLN mirrored the  
277 results seen in the spleen of m1928z-CD40L CAR T cell-treated mice (spleen:  
278 Fig 1G; tdLN: Supplementary Fig 1F), suggesting that the effect of the CD40L-  
279 armored CAR is consistent across secondary lymphoid tissues. Similar to spleen,  
280 cDC1s in both the migratory (CD11b- CD103+) and resident (CD11b- CD8a+)  
281 DC compartment were not the dominant population when mice received m1928z-  
282 CD40L CAR T cells (Supplementary Figure 1E and 1F). Furthermore, migDN  
283 DCs in the tumor-draining LN of CD40L-CAR T cell treated mice were not  
284 stimulated to proliferate (measured by Ki-67 staining) or expressed higher levels  
285 of IRF8 (an indicator for DN-to-cDC1 differentiation; Fig. 3D). These results were  
286 consistent with the spleen (Fig 3C; see also Reviewer #1, Comment & Response  
287 #4), whereas DN DCs in the tumor expressed higher levels of the proliferation  
288 marker Ki-67 and IRF8 in m1928z-CD40L CAR T cell treated mice (Fig 3B).

289 The tdLN and spleen also shared additional similarities: m1928z-CD40L CAR T  
290 cell treatment increased recruitment of DCs to both anatomical sites (Fig 1C and  
291 Fig 1D). In the tdLN, the migDC population (identified by MHC-II<sup>hi</sup> CD11c<sup>mid</sup>  
292 expression) outnumbered the resDC population (MHC-II<sup>low</sup> CD11c<sup>hi</sup>) when mice  
293 received m1928z-CD40L CAR T cells (Fig 1D). The increased recruitment of  
294 migDC into the tdLN of these mice was supported by the higher CCR7  
295 expression on tumor-resident DCs (Fig 1E), a chemokine receptor binding  
296 CCL19 and CCL21, which are predominantly produced in LNs and mediate  
297 homing of lymphoid and myeloid cells to the LN (18). Thus, m1928z-CD40L CAR  
298 T cells lead to increased recruitment of DCs into secondary lymphoid organs  
299 (tdLN & spleen) and their activation (Figures 1C, 1D, and Supplementary Figure  
300 2A; (19)), but this is not a systemic effect, as the liver (as the primary tumor site)  
301 is not infiltrated by more DCs upon treatment.

302

303 2. Statistical analysis in Figure 3E is not shown for the two treatment arms in

304 Batf3<sup>-/-</sup> mice. Elevated levels of tumor-specific CD8 T cells appear to be present  
305 in the CD40L CAR T group as compared to the control. How are these CD8 T  
306 cells being primed in the absence of cDC1?

307 We thank the reviewer for pointing out the missing statistical analysis. For  
308 clarity, we have elected to remove Figures 3C to 3E from the original manuscript.  
309 We have repeated the ELIspot experiments originally described in Figures 3C to  
310 3E and observed the same trends as seen in the original manuscript, however,  
311 not to a statistically significant degree. We now consider our initial experimental  
312 ELIspot protocol not sufficient to show endogenous CD8 T cell priming in our  
313 system. Due to the recent COVID-19-related lab shutdown, we are currently not  
314 able to explore alternative experiments.

315 Cross-priming of CD8 T cells independently of Batf3-expressing cDC1s has  
316 been described. CD169<sup>+</sup> macrophages (20,21) have been identified as possible  
317 antigen crosspresenters for CD8 T cell stimulation in LNs. In our system, we  
318 have previously reported the activation of both macrophages and DCs (19),  
319 warranting further work to establish a potential stimulatory role of macrophages  
320 in CAR T cell-treated mice. The lack of Batf3-expressing cDC1s impairs the  
321 m1928z-CD40L CAR T cell antitumor response (Fig 2D). Identification and  
322 depletion of other cross-presenting cells could possibly completely ablate the  
323 antitumor response and provide evidence that other non-cDC1s are involved as  
324 well. This comment was added to the discussion section.

325

326 3. Alternative explanations for the data presented in Figure 4 are possible. For  
327 example, protective immunity may be dependent on the presence of the CD40L  
328 CAR T cells during rechallenge – with the CAR T essential for promoting re-  
329 expansion post challenge and/or involved in direct CD40/CD40L killing.  
330 Experiments to exclude these possibilities should be performed: e.g. depletion of  
331 the CAR T cells by targeting the congenic marker and/or transfer of endogenous  
332 CD8 T cells to a new host prior to rechallenge.

333 We agree with the reviewer's concern regarding an alternative explanation to  
334 the findings in Figure 4 and attempted to address the potential CD40/CD40L  
335 killing of residual CD40L-CAR T cells with the following experiment:

336 To exclude the possibility that any residual CD40L-CAR T cells in long-term  
337 surviving mice target A20.CD19-KO cells via CD40/CD40L-directed cytotoxicity,  
338 we collected long-term surviving mice that had normal levels of peripheral B cells  
339 (see Figure A, below). This indicated that these mice had no circulating functional  
340 anti-CD19 CAR T cells anymore, because B cell aplasia in humans and mice is a  
341 readout for the presence of functional anti-CD19 CAR T cells (22,23).  
342 Additionally, in this second re-challenge experiment, we used A20 CD40 and  
343 CD19 double-knock out cells (A20.CD40-CD19.DKO), further excluding the  
344 possibility that if there potentially are circulating non-functional m1928z-CD40L  
345 CAR T cells, the tumor cells would not be susceptible to CD40/CD40L-mediated  
346 cytotoxicity. One out of the 5 anti-CD8 depleted mice did survive and had no  
347 tumor growth (20% survival), whereas 2 out of 5 of the IgG control mice did  
348 succumb to tumor re-challenge (60% survival). Thus, a statistical significance  
349 between the two groups is not reached (see Figure B, below).

350 Due to the long nature of this experiment (50+ days for generating long-term  
351 surviving mice, plus 50+ days for the re-challenge and CD8-depletion part), in  
352 combination with the recent COVID-19-related lab shutdown, we were not able to  
353 repeat this experiment and have not included this data set in the manuscript.  
354 Whereas this preliminary result is promising in suggesting that CD40/CD40L-  
355 mediated cytotoxicity is not protective in long-term surviving mice, we  
356 acknowledge increased sample numbers are necessary to draw a conclusion.

357

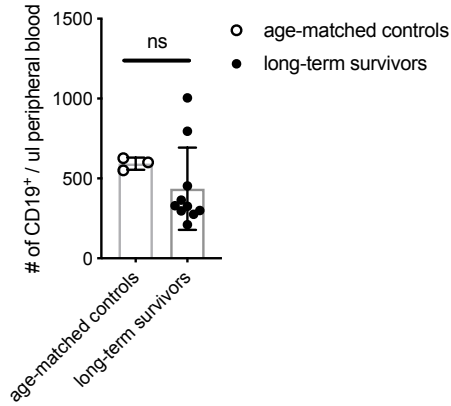

358

359 **Figure A.** Relative counts of CD19+ B cells in the peripheral blood of age-  
 360 matched and long-term surviving mice. Long-term survivors do not present with B  
 361 cell aplasia, a biomarker for anti-CD19 CAR T cell persistence. p-value was  
 362 determined by unpaired Student's t-test. ns, non-significant.

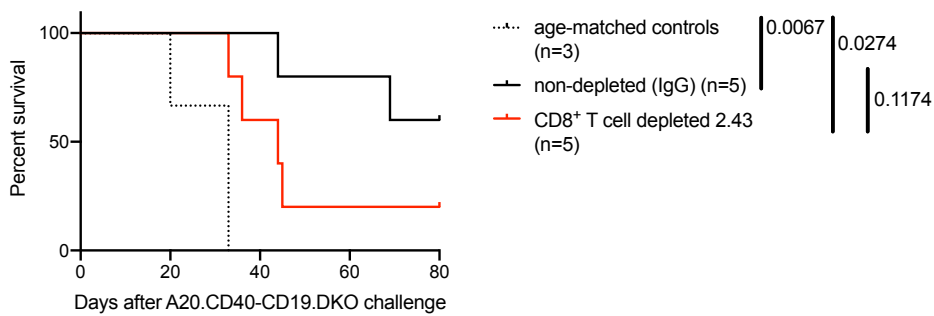

363

364 **Figure B.** Survival of mice treated with CD8 T cell-depleting antibody (clone  
 365 2.43) or non-depleting IgG control antibody). Naïve age-matched BALB/c mice  
 366 were used as controls. All p-values are were determined by a log-rank (Mantel  
 367 Cox) test.

367



368 4. Are tumor-specific tissue-resident memory cells formed and if so, are they  
369 effectively depleted prior to rechallenge?

370 We acknowledge that we do not know if tissue-resident memory cells are  
371 formed. If there are T<sub>RM</sub> CD8 T cells present and they are not depleted by anti-  
372 CD8a antibody treatment, these T<sub>RM</sub> CD8 T cells are not sufficient to protect mice  
373 from tumor re-challenge (Fig. 4).

374

375 5. The data presented appears preliminary with some experiments having as  
376 few as 2 mice/group. Can reliable statistical analysis be performed on such a  
377 small sample size? Rechallenge experiments (Figure 4D) required 19 mice – why  
378 are only five mice shown in the initial treatment data? Have the investigators  
379 repeated any of these findings to demonstrate reproducibility?

380 We thank the reviewer for pointing out the limited number of sample size in  
381 certain experiments and have updated the revised manuscript to reflect more  
382 reliable statistical analysis. The interpretation of the data in question remains  
383 unchanged.

384 Also, we have included additional survival graphs with long-term surviving  
385 m1928z-CD40L CAR T cell-treated mice in the Supplemental Figure 5. These  
386 long-term surviving mice were used in subsequent re-challenge experiments and  
387 were collected from independently performed experiments to demonstrate  
388 experimental reproducibility.

389

390 6. How broad is the endogenous T cell response generated?

391 We acknowledge that we have not quantified the degree of endogenous T cell  
392 clones responding to the tumor challenge. However, we would like to emphasize  
393 that Figure 4 demonstrates overall depletion of CD8 T cells prevents protection  
394 from tumor re-challenge. TCR sequencing and/or flow cytometry-based TCR V $\beta$   
395 analysis of the T cell repertoire upon re-challenge with antigen-negative tumor  
396 cells, as done in that experiment, could provide evidence for the clonality of the  
397 protective T cell response.

398

399 7. How are the transferred CD40L CAR T modulating the cDC1 compartment?

400 As Reviewer #1 has asked a similar question, we have copied our response  
401 here and hope that it satisfies this critique:

402 We appreciate the reviewer's suggestion to analyze the tumor-draining lymph  
403 nodes (tdLNs) and have included data reporting differences in m1928z and  
404 m1928z-CD40L CAR T cell-treated mice in the revised manuscript.

405 As primary tumor growth occurs in the liver after i.v. injection of A20 lymphoma  
406 cells, we focused our analysis on the coeliac and portal LNs, which drain the liver  
407 tissue in mice (1). The changes in cDC subtype ratio in the tdLN mirrored the  
408 results seen in the spleen of m1928z-CD40L CAR T cell-treated mice (spleen:  
409 Fig 1G; tdLN: Supplementary Fig 1F), suggesting that the effect of the CD40L-  
410 armored CAR is consistent across secondary lymphoid tissues. Similar to spleen,  
411 cDC1s in both the migratory (CD11b<sup>-</sup> CD103<sup>+</sup>) and resident (CD11b<sup>-</sup> CD8a<sup>+</sup>)  
412 DC compartment were not the dominant population when mice received m1928z-  
413 CD40L CAR T cells (Supplementary Figure 1E and 1F). Furthermore, migDN  
414 DCs in the tumor-draining LN of CD40L-CAR T cell treated mice were not  
415 stimulated to proliferate (measured by Ki-67 staining) or expressed higher levels  
416 of IRF8 (an indicator for DN-to-cDC1 differentiation; Fig. 3D). These results were  
417 consistent with the spleen (Fig 3C; see also Reviewer #1, Comment & Response  
418 #4), whereas DN DCs in the tumor expressed higher levels of the proliferation  
419 marker Ki-67 and IRF8 in m1928z-CD40L CAR T cell treated mice (Fig. 3B).

420 The tdLN and spleen also shared additional similarities: m1928z-CD40L CAR T  
421 cell treatment increased recruitment of DCs to both anatomical sites (Fig 1C and  
422 Fig 1D). In the tdLN, the migDC population (identified by MHC-II<sup>hi</sup> CD11c<sup>mid</sup>  
423 expression) outnumbered the resDC population (MHC-II<sup>low</sup> CD11c<sup>hi</sup>) when mice  
424 received m1928z-CD40L CAR T cells (Fig 1D). The increased recruitment of  
425 migDC into the tdLN of these mice was supported by the higher CCR7  
426 expression on tumor-resident DCs (Fig 1E), a chemokine receptor binding  
427 CCL19 and CCL21, which are predominantly produced in LNs and mediate

428 homing of lymphoid and myeloid cells to the LN (18). Thus, m1928z-CD40L CAR  
429 T cells lead to increased recruitment of DCs into secondary lymphoid organs  
430 (tdLN & spleen) and their activation (Figures 1C, 1D, and Supplementary Figure  
431 2A; (19)), but this is not a systemic effect, as the liver (as the primary tumor site)  
432 is not infiltrated by more DCs upon treatment.

433

434 8. Why is the ratio of cDC1 to cDC2 different at differing sites – was this also  
435 observed in the tumor-draining lymph nodes?

436 As outlined in Response #1, we have now included data of the tdLN in the  
437 revised manuscript.

438 A discussion of different cDC1-to-cDC2 ratios in different tissues was added to  
439 the Discussion section:

440 “Why the cDC1-to-cDC2 ratio increases in tumors of m1928z-CD40L CAR T  
441 cell treated mice is unclear and warrants further investigation. The accumulation  
442 of cDC1s in the tumor tissue has been attributed to several NK cell-derived  
443 cytokines such as CCL5, FLT3L, and XCL1 (5,6). Conventional DCs in peripheral  
444 tissue have a half-life of about 3 to 6 days and are maintained by tissue-resident  
445 pre-cDCs that originate in and exit from the bone marrow (24,25). This process  
446 can be observed in a mouse model of influenza infection, when pre-cDCs traffic  
447 to the infected lung tissue and locally increase the cDC numbers (26). We see  
448 increased proliferation of cDCs after CD40L-CAR T cell treatment only in the  
449 tumor and not in lymphoid tissue. More importantly, CD40L-CAR T cell treatment  
450 skews the cDC1-to-cDC2 ratio in favor of the cDC1s by promoting differentiation  
451 of progenitor IRF8<sup>+</sup> DN progenitor cells to cDC1s. This is similar to published  
452 results, where homeostasis and generation of cDCs in peripheral tissue is  
453 maintained by mobilization of progenitor cDCs from the bone marrow (4,26). Both  
454 endogenous and exogenously applied FLT3L are instructive in mediating this  
455 effect (4,24,25), suggesting a pathway that potentially is activated upon CD40L-  
456 CAR T cell treatment. It is unclear if pre-cDCs found in different tissues respond  
457 to differentiation signals differently, warranting further analysis of progenitor DCs

458 residing in different tissues. “

459

460 Reviewer #3, expert on CAR-T cells (Remarks to the Author):

461

462 In this manuscript Kuhn and colleagues describe a followup study from a recent  
463 manuscript (Kuhn et al, Cancer Cell, 2019) in which they demonstrate that  
464 coexpression of CD40-ligand on CAR T cells enhances their activity, decreases  
465 the needs for lymphodepletion, and increases the endogenous T cell response,  
466 allowing for elimination of antigen negative tumor cells. In the current manuscript,  
467 the authors use a BATF3- KO mouse model (which lacks type 1 conventional  
468 dendritic cells) in order to elucidate the mechanism of how overexpression of  
469 CD40L on syngeneic CAR T cells results in enhanced efficacy. While the KO  
470 model is interesting and does provide a small window of mechanistic insight to  
471 the previously reported finding of enhancement of the endogenous immune  
472 response, it does not explain all of the improved efficacy obtained by using the  
473 CD40L CAR T cells. Additionally, the previously published manuscript already  
474 showed that CD40L+ CAR T cells license dendritic cells (and that

475 their increased activity was ablated in CD40 KO mice), thus it is not completely  
476 surprising that in this current manuscript that these CD40L+ CAR T cells prime  
477 CD8 cells. Overall, this paper is interesting but does not substantially add  
478 fundamentally new knowledge about the function or mechanism of CD40L+ CAR  
479 T cells.

480

481 Figure 1:

482 Figure B/C- This difference in DC recruitment by CAR T cells overexpressing  
483 CD40L vs those that do not to tumor vs peripheral lymphoid tissue was already  
484 previously shown in the last publication.

485 Figure D -What is new and nicely demonstrated here is that the makeup of the  
486 dendritic cell types is different for mice treated with CD40L+ CAR T cells with  
487 cDC1 being a larger proportion in the tumor and cDC2 being a larger proportion

488 in the periphery. However, the authors do not dive into the larger questions of  
489 what this means. What is the role of cDC1 v cDC2 in the periphery? Do those  
490 matter or is this merely an observation?

491 The role of cDC1 versus cDC2 in the periphery is currently of great scientific  
492 and translational interest, as both cell populations interact with CD8 and CD4 T  
493 cells, respectively, to instruct immune responses against pathogens, as well as  
494 malignant cell growth (27). In the periphery, cDC1s sample tumor material,  
495 upregulate CCR7 to migrate to draining LNs, where they are the most potent  
496 CD8 T cell stimulators, compared to other DC subtypes (4,28). Direct priming of  
497 CD8 T cells by cDC1s independently of LN migration has also been described  
498 (29), indicating that cDC1s in the periphery are essential to initiate an antitumor  
499 CD8 T cell response.

500 As also mentioned above in response to Reviewer #1 Comment #3, the role of  
501 peripheral cDC2s in the antitumor response is less explored. This can be  
502 attributed to the lack of faithful cDC2-depletion methods, both genetic and  
503 pharmacologic methods can only partially deplete cDC2s or inhibit their migratory  
504 potential (27). Thus, we are limited in assessing the relevance of cDC2s in our  
505 system. This concern was added to the results section of the revised manuscript.

506 Focusing on the role of peripheral cDC1s in our model, we can show that their  
507 relative accumulation compared to cDC2s is specifically induced by the CD40L-  
508 armored CAR T cells (Fig 1H and 1I). Additionally, their presence is necessary  
509 for the CD40L-armored CAR T cells to exert their full antitumor effect (Fig 2A and  
510 2D). Furthermore, in *Cd40*<sup>-/-</sup> mice, which do not benefit from CD40L-armored  
511 CAR treatment (19), the changes in peripheral DC subtypes is not observed,  
512 indicating a connection between improved antitumor response, CD40-CD40L  
513 host interactions, and peripheral cDC1 accumulation (Figure 1I and  
514 Supplementary Figure 2E). This new data was added to the revised manuscript.

515

516 Figure 2: This is a very small figure, can likely be combined with figure 1. The  
517 level of the effect here of BATF3-KO is small. The KM curves are somewhat

518 similar (though there are a number of mice cured in WT and not BATF3-KO,  
519 those mice that do die of tumor do so at similar times). Additionally, the CD40L+  
520 CAR T cells maintain greater activity compared to traditional CAR T cells even in  
521 BATF3-KO mice. Why is this? What is the mechanism other than dendritic cell  
522 priming of T cells? The authors go down the mechanism of the cDC1 priming, but  
523 this is only a small part of the mechanism of why CD40L+ CAR T cells are  
524 superior (and one that had been explored previously).

525 Additionally, I wonder whether the BATF3-KO mice have cDC2? If so, are they  
526 still increased in the periphery when treated with CD40L+ CAR T cells?

527 We thank the reviewer for pointing out cDC1-independent antitumor  
528 mechanisms that are induced by CD40L-armed CAR T cells. A similar point of  
529 discussion was raised by Reviewer #2 and we discuss cross-presentation of  
530 antigens to CD8 T cells independently of cDC1s as another mechanism for T cell  
531 priming under “Reviewer #2 Comment #2”. Additionally, we want to emphasize  
532 that we do not propose that the improved antitumor effect of CD40L-armed  
533 CAR T cells is solely dependent on cDC1-CD8 T cell priming. As presented in  
534 Figure 4, both endogenous T cells and, more importantly, CAR T cells in  
535 m1928z-CD40L-treated mice produce more IFN $\gamma$  effector cytokine, even when  
536 cDC1s are absent in *Batf3*<sup>-/-</sup> mice. Other *Cd40* expressing cells, such as  
537 macrophages and non-cDC1s, can be licensed by CD40L-armed CAR T cells,  
538 provide a pro-inflammatory environment, and thereby aid the CD40L+ CAR T  
539 cells in an improved antitumor response (19). This was added to the discussion  
540 section.

541 *Batf3*<sup>-/-</sup> mice are selectively depleted of cDC1s (3) (Fig 2A). They still have  
542 cDC2s. The absolute number of peripheral cDC2s in both mice is unchanged  
543 after m1928z-CD40L CAR T cell treatment:

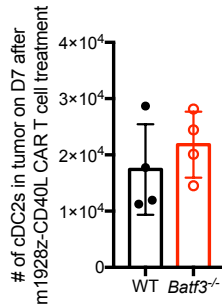

544

545

546 Figure 3:

547 3A-B: Here, the authors first show that endogenous T cells obtained from mice  
 548 treated with CD40L+ CAR T cells make more cytokine in response to  
 549 PMA/Ionomycin stimulation than endogenous T cells obtained from mice treated  
 550 with traditional CAR T cells in both WT and BATF3-KO mice. This would indicate  
 551 that the CD40L+ CAR T cells somehow stimulate or prime the other T cells to be  
 552 more effective-would be nice to look at this mechanism as it could account for  
 553 most of the reason CD40L+ CAR T cells are superior to traditional CARs.

554 For clarity, this data is now found as [Supplementary Figure 4](#).

555 As pointed out in the previous response to Figure 2, m1928z-CD40L CAR T  
 556 cells induce licensing of both splenic cDC1 ([Supplementary Figure 2A](#)) and non-  
 557 cDC1 myeloid cell populations (19). Subsequently, we demonstrated that host  
 558 *Cd40* expression is necessary for CD40-CD40L crosstalk between host myeloid  
 559 cells and CD40L+ CAR T cells, as this effect of myeloid cell licensing is lost in  
 560 *Cd40*<sup>-/-</sup> mice. Concurrently, endogenous T cells are also not primed in *Cd40*<sup>-/-</sup>  
 561 mice when treated with CD40L+ CAR T cells and these mice are not able to  
 562 mount an effective antitumor immune response (19). Thus, we attribute the  
 563 production of IFN $\gamma$  and TNF $\alpha$  of endogenous T cells after non-specific  
 564 PMA/Ionomycin stimulation in the context of CD40L+ CAR T cell treatment to  
 565 host *Cd40* expression, and not to the presence of cDC1s.

566

567 3C-E: They also used congenic markers to analyze the cytokine produced by  
 568 endogenous T cells obtained from these mice in response to tumor. Here, they

569 say that the endogenous cells in mice treated with CD40L+ CARs are only  
570 superior to mice treated with regular CARs in those mice that are WT and not  
571 BATF3-KO. However, that does not appear to be supported by the data. In 3D,  
572 the ELISpots do appear to be more abundant in the bottom right than bottom left.  
573 Additionally, though it may not be statistically significant likely due to high  
574 variability, the numbers in 3E are clearly greater for CD40L+ CAR treated  
575 BATF3-KO mice than those treated with regular CAR T cells. Thus again, CD40L  
576 CAR T cells seem to have an effect on endogenous CAR T cells that is not  
577 dependent on cDC1, and this should be investigated more thoroughly. The more  
578 significant difference here seems to be that overall there is a decrease in  
579 cytokine produced by endogenous T cells from BATF3 KO mice. This may be  
580 due to cDC1 deletion, but BATF3-KO can have other effects on immune cells, so  
581 this should be confirmed after antibody depletion of cDC1.

582 We thank the reviewer for pointing out the difference in IFN $\gamma$  cytokine  
583 production in *Batf3*<sup>-/-</sup> mice treated with CAR or CD40L+ CAR T cells. For clarity,  
584 we have elected to remove Figures 3C to 3E from the original manuscript. We  
585 have repeated the ELIspot experiments originally described in Figures 3C to 3E  
586 and observed the same trends as seen in the original manuscript, however, not  
587 to a statistically significant degree. We now consider our initial experimental  
588 ELIspot protocol not sufficient to show endogenous CD8 T cell priming in our  
589 system. Due to the recent COVID-19-related lab shutdown, we are currently not  
590 able to explore alternative experiments.

591 cDC1-independent CD8 T cell antigen-crosspriming has been described in the  
592 context of antitumor responses. CD169+ macrophages have been identified as  
593 possible crosspresenters for CD8 T cell stimulation (21). Further work is  
594 warranted to identify this cell type in our system and a possible significance in  
595 cDC1-independent cross-presentation. However, any changes in T cell priming  
596 seen in *Batf3*<sup>-/-</sup> mice when compared to wild-type mice can be attributed to the  
597 absence of cDC1s. Hildner et al. demonstrated that knocking out the transcription  
598 factor *Batf3* specifically depleted the cDC1 population, whereas other immune



599 cell populations (B cells, CD4 T cells, CD8 T cells, NK cells, cDC2s,  
600 plasmacytoid DCs) were not affected (3). We are not aware of antibody-mediated  
601 cDC1 depletion, as cDC1s do not express a surface marker that is exclusively  
602 expressed by cDC1s (for example, integrin alpha E (= CD103) is also expressed  
603 by tissue-resident memory T<sub>RM</sub> cells (30)). We have added a paragraph  
604 addressing non-cDC1-mediated CD8 T cell crosspriming to the discussion  
605 section of the revised manuscript.

606

607 Figure 4: I have no comments, this is well performed, but frankly not entirely  
608 surprising that CD8 depletion would prevent tumor rejection.

609

610 References:

- 611 1. Barbier L, Tay SS, McGuffog C, Triccas JA, McCaughan GW, Bowen DG,  
612 et al. Two lymph nodes draining the mouse liver are the preferential site of  
613 DC migration and T cell activation. *J Hepatol.* 2012;
- 614 2. Broz ML, Binnewies M, Boldajipour B, Nelson AE, Pollack JL, Erle DJ, et  
615 al. Dissecting the Tumor Myeloid Compartment Reveals Rare Activating  
616 Antigen-Presenting Cells Critical for T Cell Immunity. *Cancer Cell.* 2014;
- 617 3. Hildner K, Edelson BT, Purtha WE, Diamond M, Matsushita H, Kohyama  
618 M, et al. Batf3 deficiency reveals a critical role for CD8 $\alpha$  + dendritic cells in  
619 cytotoxic T cell immunity. *Science* (80- ). 2008;
- 620 4. Salmon H, Idoyaga J, Rahman A, Leboeuf M, Remark R, Jordan S, et al.  
621 Expansion and Activation of CD103+ Dendritic Cell Progenitors at the  
622 Tumor Site Enhances Tumor Responses to Therapeutic PD-L1 and BRAF  
623 Inhibition. *Immunity.* 2016;44(4):924–38.
- 624 5. Barry KC, Hsu J, Broz ML, Cueto FJ, Binnewies M, Combes AJ, et al. A  
625 natural killer–dendritic cell axis defines checkpoint therapy–responsive  
626 tumor microenvironments. *Nat Med.* 2018;
- 627 6. Böttcher JP, Bonavita E, Chakravarty P, Blees H, Cabeza-Cabrerizo M,  
628 Sammicheli S, et al. NK Cells Stimulate Recruitment of cDC1 into the  
629 Tumor Microenvironment Promoting Cancer Immune Control. *Cell.* 2018;

- 630 7. Lewis KL, Caton ML, Bogunovic M, Greter M, Grajkowska LT, Ng D, et al.  
631 Notch2 receptor signaling controls functional differentiation of dendritic  
632 cells in the spleen and intestine. *Immunity*. 2011;
- 633 8. Satpathy AT, Briseño CG, Lee JS, Ng D, Manieri NA, Kc W, et al. Notch2-  
634 dependent classical dendritic cells orchestrate intestinal immunity to  
635 attaching-and-effacing bacterial pathogens. *Nat Immunol*. 2013;
- 636 9. Schlitzer A, McGovern N, Teo P, Zelante T, Atarashi K, Low D, et al. IRF4  
637 Transcription Factor-Dependent CD11b+ Dendritic Cells in Human and  
638 Mouse Control Mucosal IL-17 Cytokine Responses. *Immunity*. 2013;
- 639 10. Bajaan S, Turner S, Paul J, Ainsua-Enrich E, Kovats S. IRF4 and IRF8 Act  
640 in CD11c + Cells To Regulate Terminal Differentiation of Lung Tissue  
641 Dendritic Cells . *J Immunol*. 2016;
- 642 11. Fütterer A, Mink K, Luz A, Kosco-Vilbois MH, Pfeffer K. The lymphotoxin  $\beta$   
643 receptor controls organogenesis and affinity maturation in peripheral  
644 lymphoid tissues. *Immunity*. 1998;
- 645 12. Kabashima K, Banks TA, Ansel KM, Lu TT, Ware CF, Cyster JG. Intrinsic  
646 lymphotoxin- $\beta$  receptor requirement for homeostasis of lymphoid tissue  
647 dendritic cells. *Immunity*. 2005;
- 648 13. Schlitzer A, Sivakamasundari V, Chen J, Sumatoh HR Bin, Schreuder J,  
649 Lum J, et al. Identification of cDC1- and cDC2-committed DC progenitors  
650 reveals early lineage priming at the common DC progenitor stage in the  
651 bone marrow. *Nat Immunol*. 2015;
- 652 14. Grajales-Reyes GE, Iwata A, Albring J, Wu X, Tussiwand R, Kc W, et al.  
653 Batf3 maintains autoactivation of Irf8 for commitment of a CD8 $\alpha$  +  
654 conventional DC clonogenic progenitor. *Nat Immunol*. 2015;
- 655 15. Lai J, Mardiana S, House IG, Sek K, Henderson MA, Giuffrida L, et al.  
656 Adoptive cellular therapy with T cells expressing the dendritic cell growth  
657 factor Flt3L drives epitope spreading and antitumor immunity. *Nat*  
658 *Immunol*. 2020;
- 659 16. Sichien D, Scott CL, Martens L, Vanderkerken M, Van Gassen S, Plantinga  
660 M, et al. IRF8 Transcription Factor Controls Survival and Function of

- 661 Terminally Differentiated Conventional and Plasmacytoid Dendritic Cells,  
662 Respectively. *Immunity*. 2016;
- 663 17. Ginhoux F, Liu K, Helft J, Bogunovic M, Greter M, Hashimoto D, et al. The  
664 origin and development of nonlymphoid tissue CD103+ DCs. *J Exp Med*.  
665 2009;
- 666 18. Förster R, Davalos-Miszlitz AC, Rot A. CCR7 and its ligands: Balancing  
667 immunity and tolerance. *Nature Reviews Immunology*. 2008.
- 668 19. Kuhn NF, Purdon TJ, van Leeuwen DG, Lopez A V., Curran KJ, Daniyan  
669 AF, et al. CD40 Ligand-Modified Chimeric Antigen Receptor T Cells  
670 Enhance Antitumor Function by Eliciting an Endogenous Antitumor  
671 Response. *Cancer Cell*. 2019;
- 672 20. Bernhard CA, Ried C, Kochanek S, Brocker T. CD169+ macrophages are  
673 sufficient for priming of CTLs with specificities left out by cross-priming  
674 dendritic cells. *Proc Natl Acad Sci U S A*. 2015;
- 675 21. Asano K, Nabeyama A, Miyake Y, Qiu CH, Kurita A, Tomura M, et al.  
676 CD169-Positive Macrophages Dominate Antitumor Immunity by  
677 Crosspresenting Dead Cell-Associated Antigens. *Immunity*. 2011;
- 678 22. Brentjens RJ, Rivière I, Park JH, Davila ML, Wang X, Stefanski J, et al.  
679 Safety and persistence of adoptively transferred autologous CD19-targeted  
680 T cells in patients with relapsed or chemotherapy refractory B-cell  
681 leukemias. *Blood*. 2011;
- 682 23. Davila ML, Kloss CC, Gunset G, Sadelain M. CD19 CAR-Targeted T Cells  
683 Induce Long-Term Remission and B Cell Aplasia in an Immunocompetent  
684 Mouse Model of B Cell Acute Lymphoblastic Leukemia. *PLoS One*.  
685 2013;8(4).
- 686 24. Liu K, Victora GD, Schwickert TA, Guermonprez P, Meredith MM, Yao K,  
687 et al. In Vivo Analysis of Dendritic Cell Development and Homeostasis.  
688 *Science (80- )*. 2009;
- 689 25. Hochweller K, Miloud T, Striegler J, Naik S, Hämmerling GJ, Garbi N.  
690 Homeostasis of dendritic cells in lymphoid organs is controlled by  
691 regulation of their precursors via a feedback loop. *Blood*. 2009;

- 692 26. Cabeza-Cabrerizo M, van Blijswijk J, Wienert S, Heim D, Jenkins RP,  
693 Chakravarty P, et al. Tissue clonality of dendritic cell subsets and  
694 emergency DCpoiesis revealed by multicolor fate mapping of DC  
695 progenitors. *Sci Immunol*. 2019;
- 696 27. Durai V, Murphy KM. Functions of Murine Dendritic Cells. *Immunity*. 2016.
- 697 28. Roberts EW, Broz ML, Binnewies M, Headley MB, Nelson AE, Wolf DM, et  
698 al. Critical Role for CD103+/CD141+ Dendritic Cells Bearing CCR7 for  
699 Tumor Antigen Trafficking and Priming of T Cell Immunity in Melanoma.  
700 *Cancer Cell*. 2016;
- 701 29. Thompson ED, Enriquez HL, Fu Y-X, Engelhard VH. Tumor masses  
702 support naive T cell infiltration, activation, and differentiation into effectors.  
703 *J Exp Med*. 2010;
- 704 30. Masopust D, Soerens AG. Tissue-Resident T Cells and Other Resident  
705 Leukocytes. *Annu Rev Immunol*. 2019;
- 706

## REVIEWER COMMENTS

### Reviewer #1 (Remarks to the Author):

While the first version of the manuscript was somewhat underwhelming, the authors made an impressive effort to address key concerns, which made the paper much stronger.

My only remaining request is that the authors acknowledge in the Discussion section the limitations of using a disseminated lymphoma model in lieu of a bona fide solid tumor (Query #5).

MM

### Reviewer #2 (Remarks to the Author):

The authors have provided additional information within the revised manuscript to clarify several points raised previously.

1. There still remains no clear evidence on the location of T cell priming in the data presented. The authors include additional data suggesting migratory DCs on D7 are preferentially recruited to the draining nodes following treatment with CD40L CAR T cells (Fig1D). These migratory DCs are identified by increased expression of MHC II. An alternative interpretation is that intact CD40L signalling activates LN resident DCs and this could be why the proportion of MHC II<sup>high</sup> DCs are present. Sole reliance on MHC II upregulation is not a reliable marker in these circumstances for identifying migratory DCs. In addition, were DCs enumerated in these experiments, consistent with the data presented in Fig 1 B-C? 2. The authors state treatment with CD40L CAR T skew the tumor resident cDC1 to cDC2 in favor of cDC1 – however, this is not observed in lymphoid compartments, where TDLN have decrease in CD103 migratory DC (Supp Fig 1E) and splenic cDC1 (Supp Fig 1D D7). These observations between tissues are not highlighted in the results, as well as the author's interpretations of this presented data. Is there any evidence that the increased recruitment of DCs across anatomical sites results in improved priming of T cells?

2. As this study focusses on the mechanisms underpinning CD40L-CAR T treatment, the role of non-cDC1 should be explored in light of the findings in Batf3 KO mice. Are these non-cDC1 cells playing a major role in the therapeutic efficacy observed following transfer of CD40L CAR T in wildtype mice.

3. An increase in sample size is necessary to draw an appropriate conclusion with the new data presented in the rebuttal.

6. Experiments showing increased breadth of endogenous T cells following CD40L CAR T treatment as suggested by the authors would strengthen the manuscript.

### Reviewer #3 (Remarks to the Author):

The authors have address most of my concerns through additional experiments or in their discussion. They have done a nice job of discussing that non cDC1 cross-priming may be responsible for some of the enhanced anti-tumor activity in their model (and thus cDC1 are not solely responsible for the

activity).

I have one important concern:

Figure 2D appears to be repeated data from Figures 2B and 2C which is non-standard. The authors do not indicate how many times the experiments were performed (in this figure or others). This needs to be clarified as it appears that figure 2 is only from one experiment.

Reviewer #1 (Remarks to the Author):

While the first version of the manuscript was somewhat underwhelming, the authors made an impressive effort to address key concerns, which made the paper much stronger.

My only remaining request is that the authors acknowledge in the Discussion section the limitations of using a disseminated lymphoma model in lieu of a bona fide solid tumor (Query #5).

MM

Response:

We have edited the Discussion to acknowledge the limitations of our disseminated lymphoma model in comparison to solid tumor models – especially their differences in stromal involvement and immunosuppressive tumor microenvironments.

Reviewer #2 (Remarks to the Author):

The authors have provided additional information within the revised manuscript to clarify several points raised previously.

1. There still remains no clear evidence on the location of T cell priming in the data presented. The authors include additional data suggesting migratory DCs on D7 are preferentially recruited to the draining nodes following treatment with CD40L CAR T cells (Fig1D). These migratory DCs are identified by increased expression of MHC II. An alternative interpretation is that intact CD40L signalling activates LN resident DCs and this could be why the proportion of MHC II<sup>high</sup> DCs are present. Sole reliance on MHC II upregulation is not a reliable marker in these circumstances for identifying migratory DCs. In addition, were DCs enumerated in these experiments, consistent with the data presented in Fig 1 B-C?

The lack of CD86 upregulation on the migratory DCs after m1928z-CD40L treatment suggests that LN-resident DCs do not receive an activation signal that explains the increase of the MHCII<sup>hi</sup> CD11c<sup>int</sup> cell fraction. Whereas CD86 was upregulated in splenic cDCs upon m1928z-CD40L CAR T cell treatment (Supplementary Figure 2A), the migDC subsets and the migDC as a whole did not change CD86 expression (Supplementary Figure 2D and E). We also did not detect any proliferation marker Ki67<sup>+</sup> LN-resident cDCs (Supplementary Figure 2G), further suggesting that the increase in LN-resident migDC fraction in m1928z-CD40L CAR T cell-treated mice is not due to local proliferation.

The CD86 data on the whole splenic cDC population and the whole tdLN cDC population, as well as the Ki-67<sup>+</sup> staining of tdLN cDCs was added to Supplementary Figure 2 and is referenced in the manuscript.

The DCs in tdLNs were not enumerated. As we have previously published, intravenous injection of the A20 lymphoma cell line leads to tumor nodule growth in the liver. The coeliac and portal lymph nodes have been identified as the liver-draining lymph nodes in the mouse (Barbier et al. 2012). We noticed that Balb/c mice did not universally present with both lymph nodes. This observation was not dependent on CAR T cell treatment (m1928z vs. m1928z-CD40L) and, therefore, we did not select to enumerate total cell numbers in the tdLNs.

2. The authors state treatment with CD40L CAR T skew the tumor resident cDC1 to cDC2 in favor of cDC1 – however, this is not observed in lymphoid compartments, where TDLN have decrease in CD103 migratory DC (Supp Fig 1E) and splenic cDC1 (Supp Fig 1D D7). These observations between tissues are not highlighted in the results, as well as the author's interpretations of this presented data. Is there any evidence that the increased recruitment of DCs across anatomical sites results in improved priming of T cells?

We acknowledge that we do not have an explanation for the observed discrepancy of cDC1-to-cDC2 ratios between tissue sites. m1928z-CD40L CAR T cell treatment did induce upregulation of the proliferative marker Ki-67 and the cDC1-differentiation marker IRF8 in CD11b<sup>-</sup> CD103<sup>-</sup> DN cDCs specifically in the tumor (Figure 3). This suggests that m1928z-CD40L CAR T cells skew the cDC1-to-cDC2 ratio by stimulating DN cDCs to predominantly differentiate to cDC1s. Why this is not observed in tdLNs or in the spleen, remains to be explored. Whereas the differentiation axis of progenitor DCs coming from the bone marrow is appreciated (Schlitzer et al. 2015), how they seed the different peripheral tissues and if they then respond to different stimulus cues is still subject of intense research (Cabeza-Cabrerizo et al. 2019). These discrepancies, along with the potential effect on T cell priming,



are mentioned in paragraph #3 in the Results section and discussed in paragraphs 5 and 6 in the Discussion section.

2. As this study focusses on the mechanisms underpinning CD40L-CAR T treatment, the role of non-cDC1 should be explored in light of the findings in Batf3 KO mice. Are these non-cDC1 cells playing a major role in the therapeutic efficacy observed following transfer of CD40L CAR T in wildtype mice.

We agree that CD40L-CAR T cell treatment perhaps licenses other non-cDC1 myeloid cells that directly contribute to the increased antitumor efficacy. We do not know if these non-cDC1 cells play a major role in the therapeutic efficacy of CD40L-armed CAR T cells in wildtype mice. In the current manuscript, we are focusing on the involvement of Batf3-expressing cDC1s and their necessity for observing the full potential of the CD40L-armed CAR T cell antitumor effect. We agree that the presence and contribution of other non-cDC1 cells is likely and needs to be explored. We have toned down our statement in the abstract from claiming that CD40L-armed CAR T cells lose their antitumor function, to stating that CD40L-armed CAR T cells “elicit an impaired antitumor response”. We felt that this better reflects the point raised by the reviewer and the results shown in Figure 2.

Candidates for further evaluation are other cross-presenting cells, such as CD169+ macrophages in the peripheral tissue and lymph nodes, blood-circulating monocytes, or cDC2s. *Irf4*<sup>-/-</sup> mice provide non-complete depletion of cDC2s with impaired function to migrate to lymph nodes (Bajaña et al. 2016; Schlitzer et al. 2013). Adapting our current model from Balb/c to C57BL/6 mice will enable us to utilize such genetic mouse models on the C57BL/6 background. This is planned in future studies.

The possible involvement of other non-cDC1 myeloid cells in CD40L-CAR T cell treatment is addressed in paragraph 4 of the Discussion section.

3. An increase in sample size is necessary to draw an appropriate conclusion with the new data presented in the rebuttal.

We agree with the reviewer that an increase in sample size is necessary in order to draw an appropriate and satisfactory conclusion, regarding a potential protective effect of residual m1928z-CD40L CAR T cells in this re-challenge experiment.

We would like to point out that we have so far never been able to experimentally demonstrate a protective CD40/CD40L-mediated killing effect of CD40L-armed CAR T cells *in vivo*. In our previous published work, the CD40/CD40L-directed killing was only observed *in vitro* when CD40L-armed CAR T cells were co-cultured at a 1-to-1 ratio with tumor cells (Supplementary Figure S1C&D in (Kuhn et al. 2019)). In the same study, non-tumor-recognizing CD40L-armed CAR T cells were not able to improve survival of mice (4h11m28mz-CD40L CAR T cells in Figure 2D (Kuhn et al. 2019)). Additionally, as shown in this study in Supplementary Figure S5A, tumor-recognizing non-cytotoxic CD4<sup>+</sup> m1928z-CD40L-armed CAR T cells are also not capable of delaying tumor outgrowth in our tumor model. Thus, we would argue that the sole presence of CD40L-armed CAR T cells is not sufficient to induce protective CD40/CD40L-killing *in vivo*.

6. Experiments showing increased breadth of endogenous T cells following CD40L CAR T treatment as suggested by the authors would strengthen the manuscript.

We agree with the reviewer that our analysis does not encompass the elucidation of the breadth of the endogenous T cell response. Whereas antibody-mediated systemic depletion of CD8<sup>+</sup> T cells abrogates the protective effect of CD40L-armed CAR T cells in re-challenge experiments, we have not identified the clonality of the putative endogenous CD8<sup>+</sup> T cell response. This caveat is acknowledged in paragraph 2 of the Discussion section.

Reviewer #3 (Remarks to the Author):

The authors have address most of my concerns through additional experiments or in their discussion. They have done a nice job of discussing that non cDC1 cross-priming may be responsible for some of the enhanced anti-tumor activity in their model (and thus cDC1 are not solely responsible for the activity).

I have one important concern:

Figure 2D appears to be repeated data from Figures 2B and 2C which is non-standard. The authors do not indicate how many times the experiments were performed (in this figure or others). This needs to be clarified as it appears that figure 2 is only from one experiment.

Response:

We agree with the Reviewer's concern about Figure 2 and confirm that Figure 2D is data repeated from Figures 2B and 2C, highlighting the difference in m1928z-CD40L CAR T cell treated mice in the different mouse strains (WT vs Batf3<sup>-/-</sup>). This was initially done upon request by Reviewer #1 (Query #1).

We have now changed it back to the initial graph (first submission) and the conventional way of plotting the data as one summary graph. The data is the summary of two independent experiments (see Source Data). Figure legends indicate how many times the experiments were performed. We thank the reviewer for pointing this out and have made the necessary changes in the revised manuscript.

References:

- Bajaña, Sandra et al. 2016. "IRF4 and IRF8 Act in CD11c + Cells To Regulate Terminal Differentiation of Lung Tissue Dendritic Cells ." *The Journal of Immunology*.
- Barbier, Louise et al. 2012. "Two Lymph Nodes Draining the Mouse Liver Are the Preferential Site of DC Migration and T Cell Activation." *Journal of Hepatology*.
- Cabeza-Cabrerizo, Mar et al. 2019. "Tissue Clonality of Dendritic Cell Subsets and Emergency DCpoiesis Revealed by Multicolor Fate Mapping of DC Progenitors." *Science Immunology*.
- Kuhn, Nicholas F. et al. 2019. "CD40 Ligand-Modified Chimeric Antigen Receptor T Cells Enhance Antitumor Function by Eliciting an Endogenous Antitumor Response." *Cancer Cell*.
- Schlitzer, Andreas et al. 2013. "IRF4 Transcription Factor-Dependent CD11b+ Dendritic Cells in Human and Mouse Control Mucosal IL-17 Cytokine Responses." *Immunity*.
- Schlitzer, Andreas et al. 2015. "Identification of CDC1- and CDC2-Committed DC Progenitors Reveals Early Lineage Priming at the Common DC Progenitor Stage in the Bone Marrow." *Nature Immunology*.
